# Supplementary material
Source: PubMed Central journal article supplement (PMC8930503)

Uncropped scans with size marker indications for Extended Data Fig. 6.

Extended Data Fig. 6b

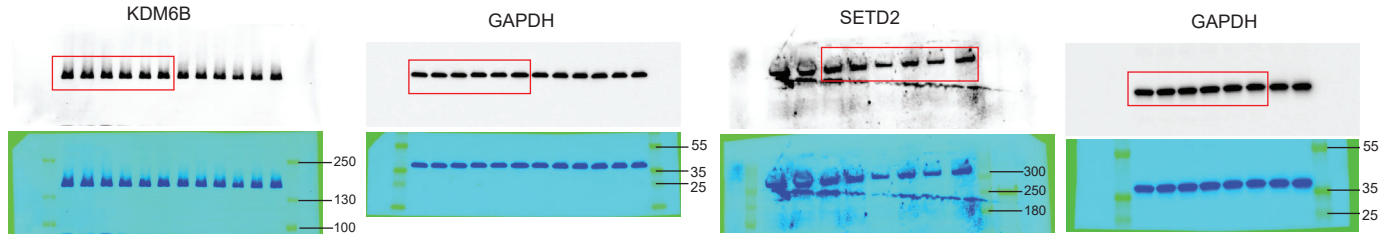

Extended Data Fig. 6c

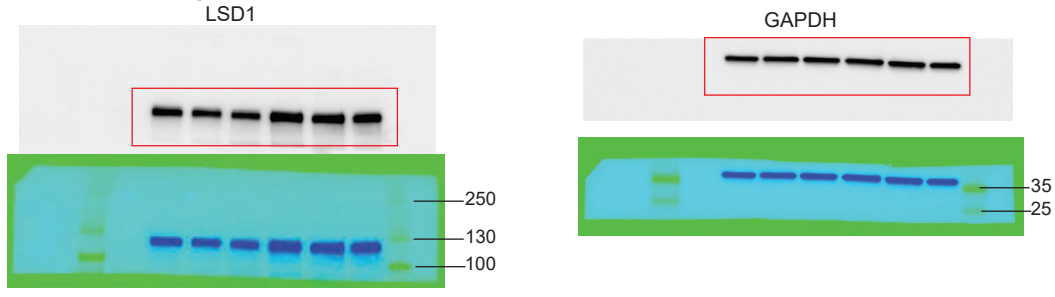

Extended Data Fig. 6e

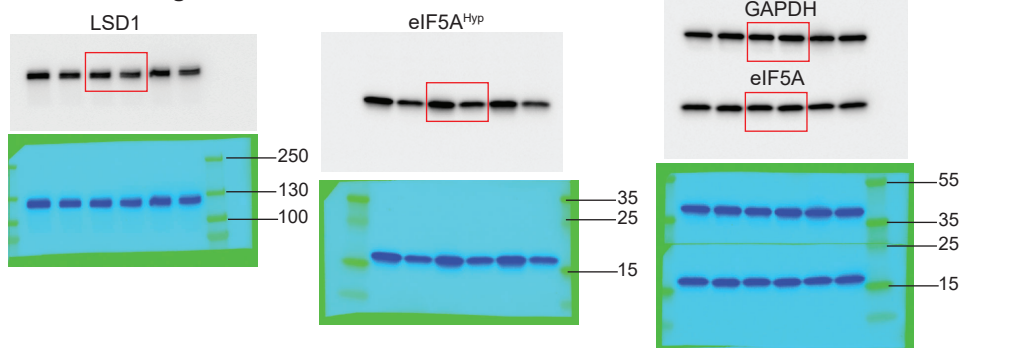

Extended Data Fig. 6f

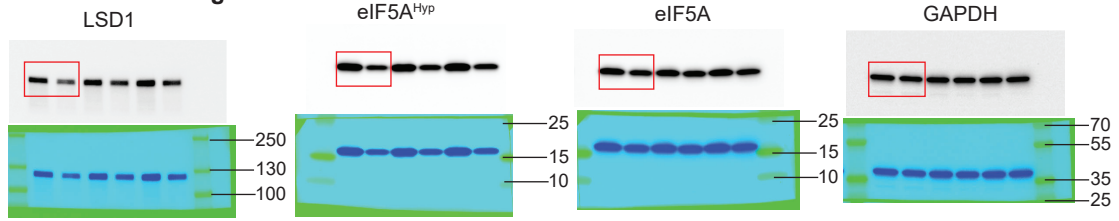

Extended Data Fig. 6g

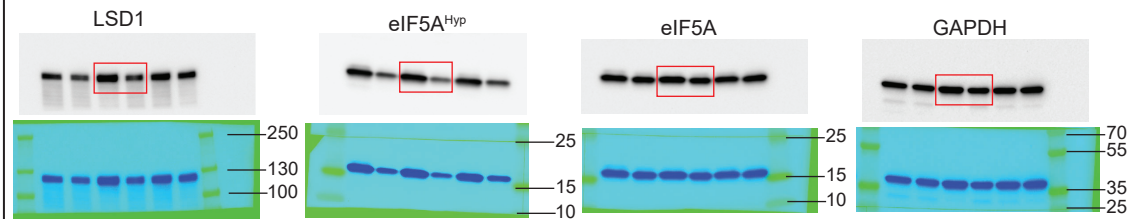

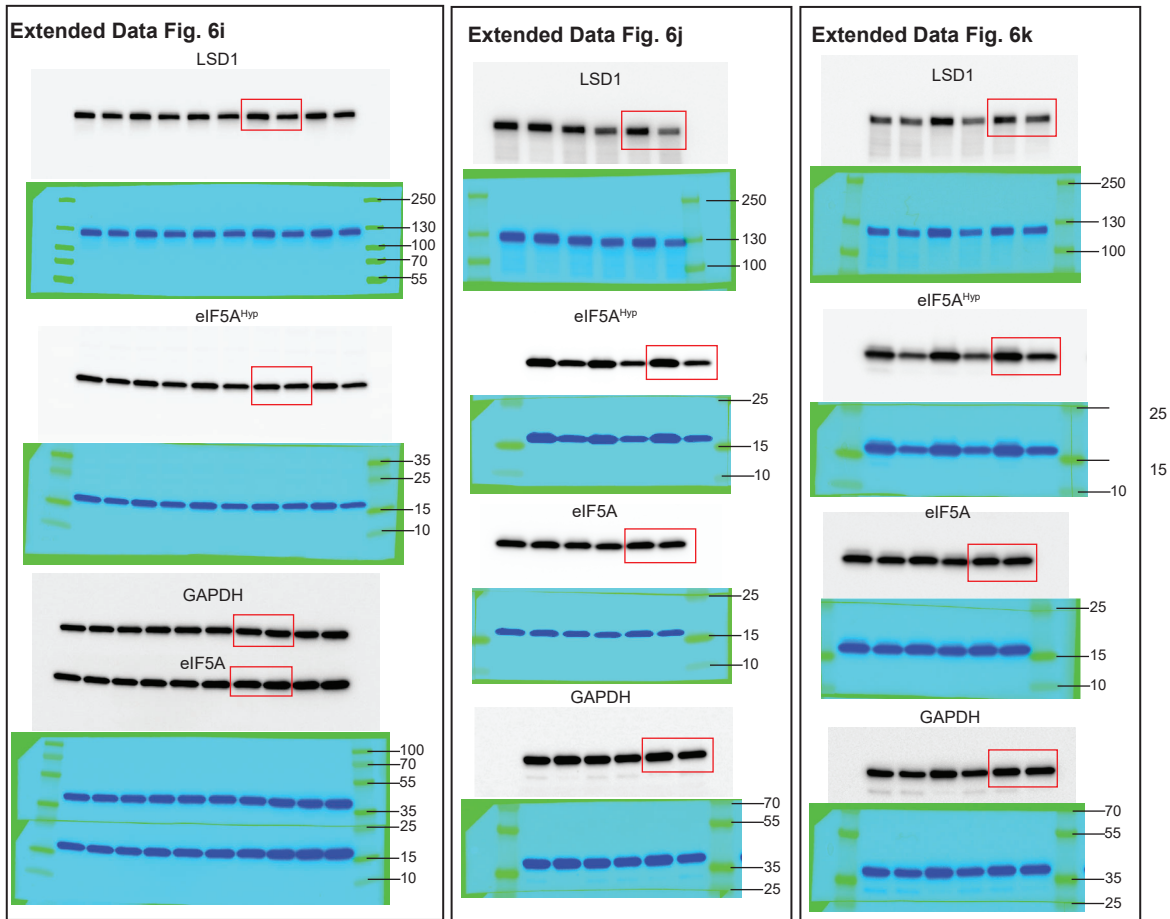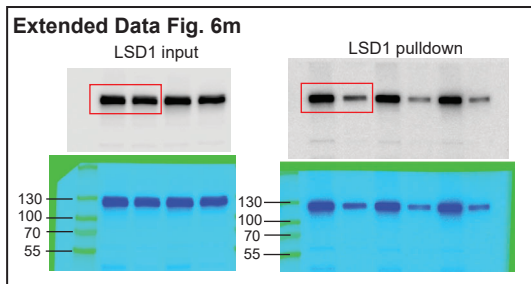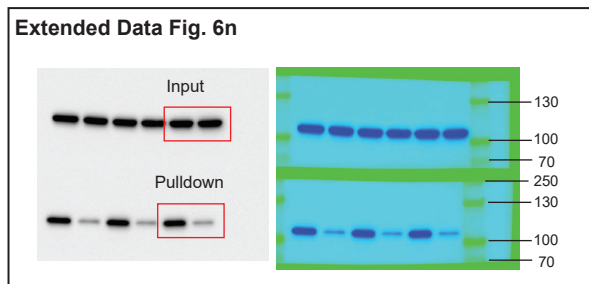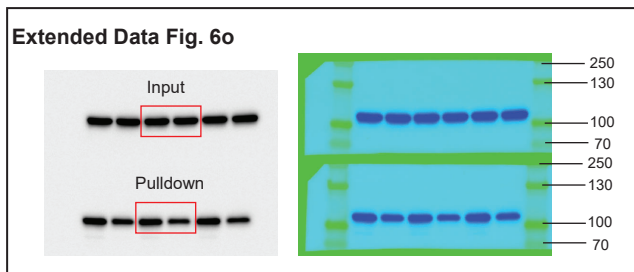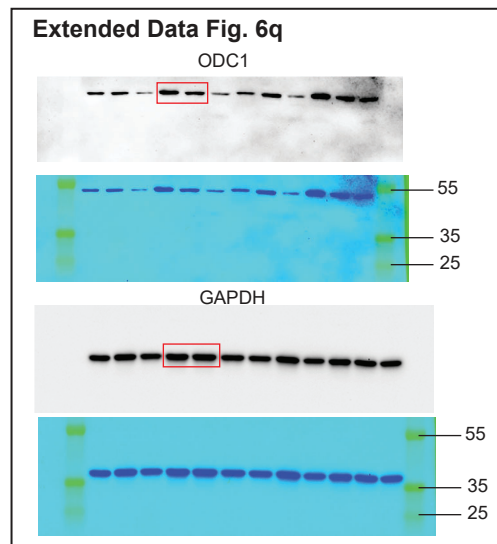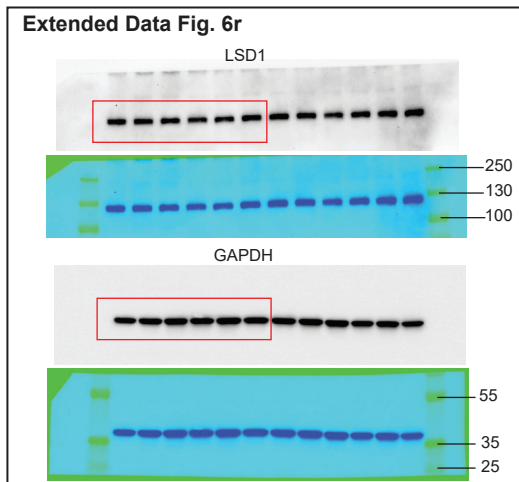

Supplement: NIHMS1771507-supplement-Li_SourceData_ED_Fig6_pdf.pdf [file NIHMS1771507-supplement-Li_SourceData_ED_Fig6_pdf.pdf]
