# Supplementary material
Source: PubMed Central journal article supplement (PMC8930503)

Uncropped scans with size marker indications for Extended Data Fig. 1.

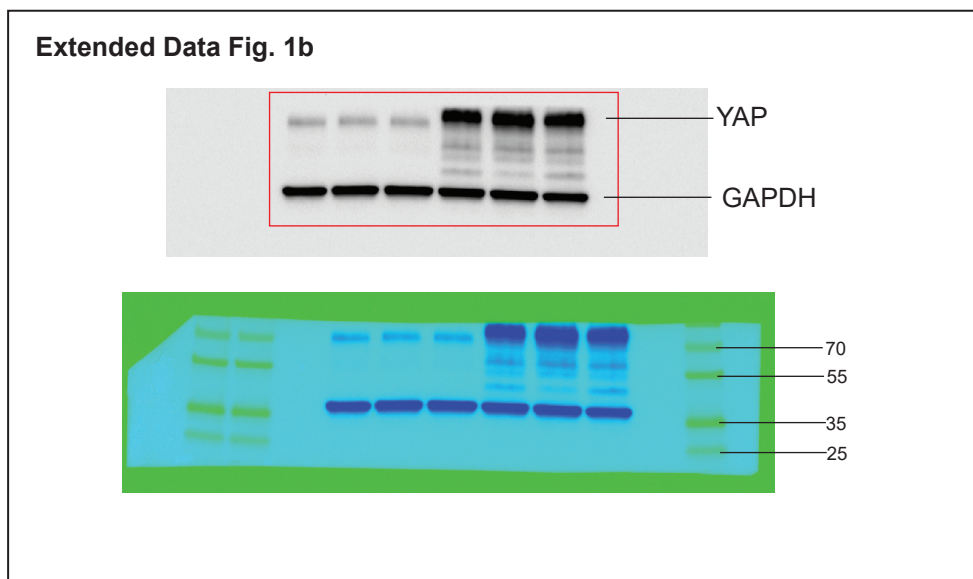

Supplement: NIHMS1771507-supplement-Li_SourceData_ED_Fig1_pdf.pdf [file NIHMS1771507-supplement-Li_SourceData_ED_Fig1_pdf.pdf]

## Uncropped scans with size marker indications for Extended Data Fig. 2.

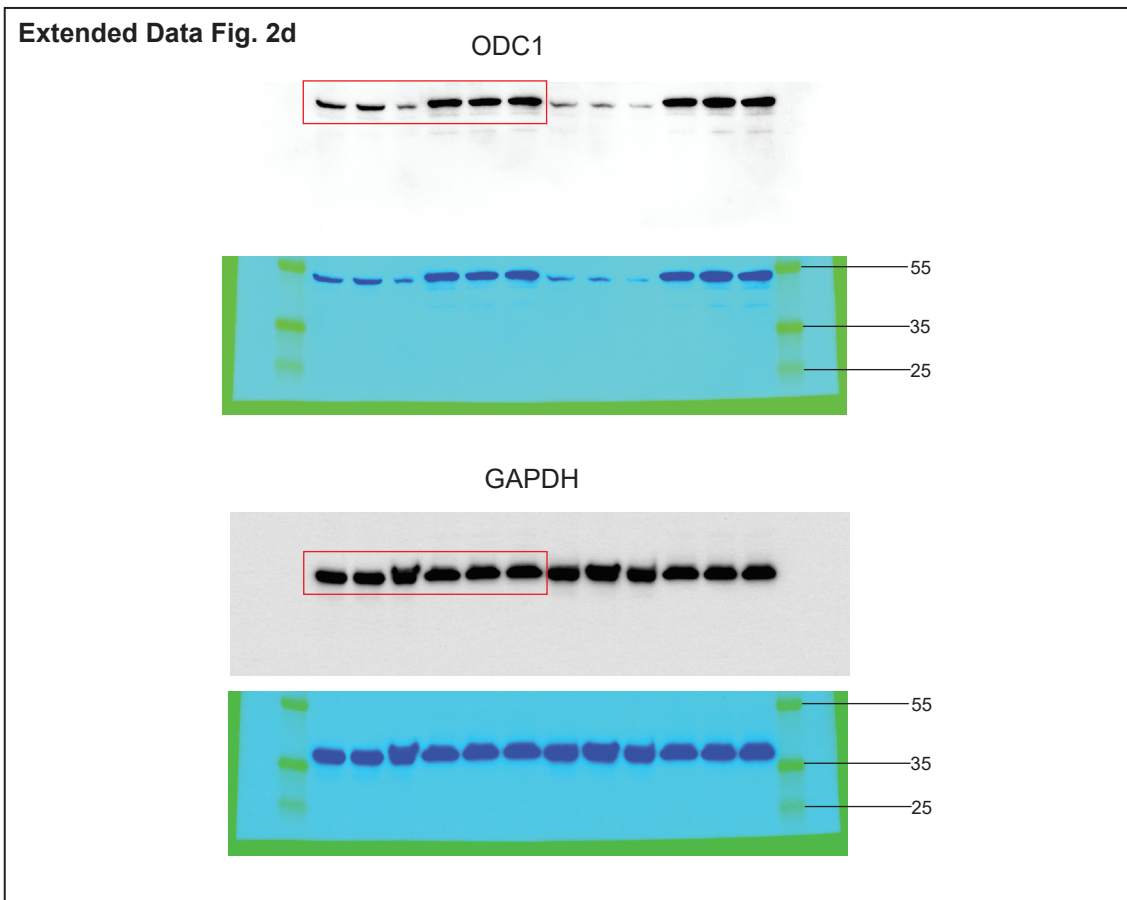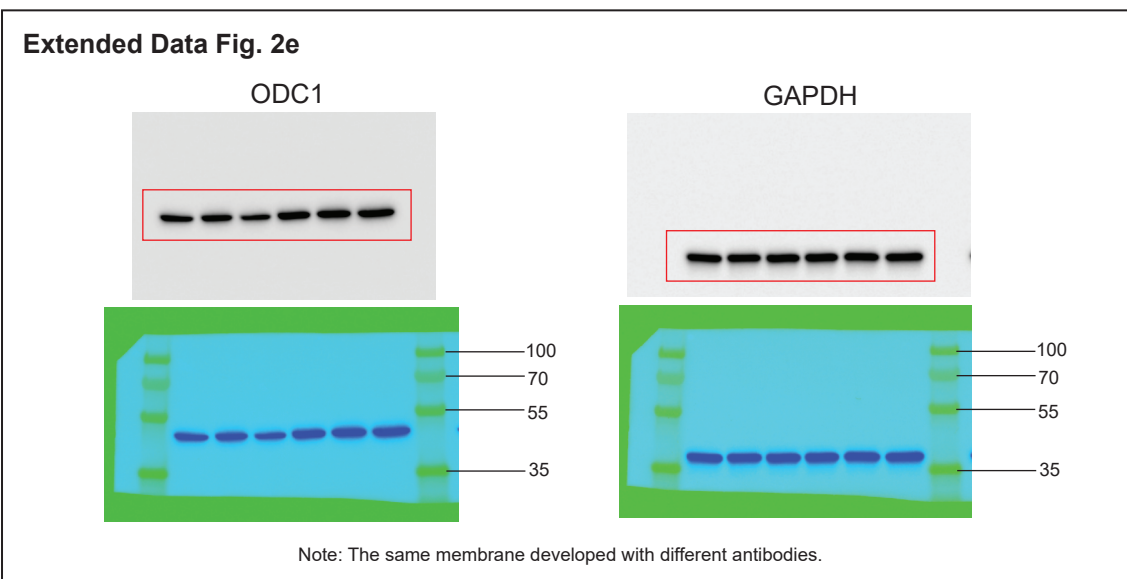

Supplement: NIHMS1771507-supplement-Li_SourceData_ED_Fig2_pdf.pdf [file NIHMS1771507-supplement-Li_SourceData_ED_Fig2_pdf.pdf]

Uncropped scans with size marker indications for Extended Data Fig. 4.

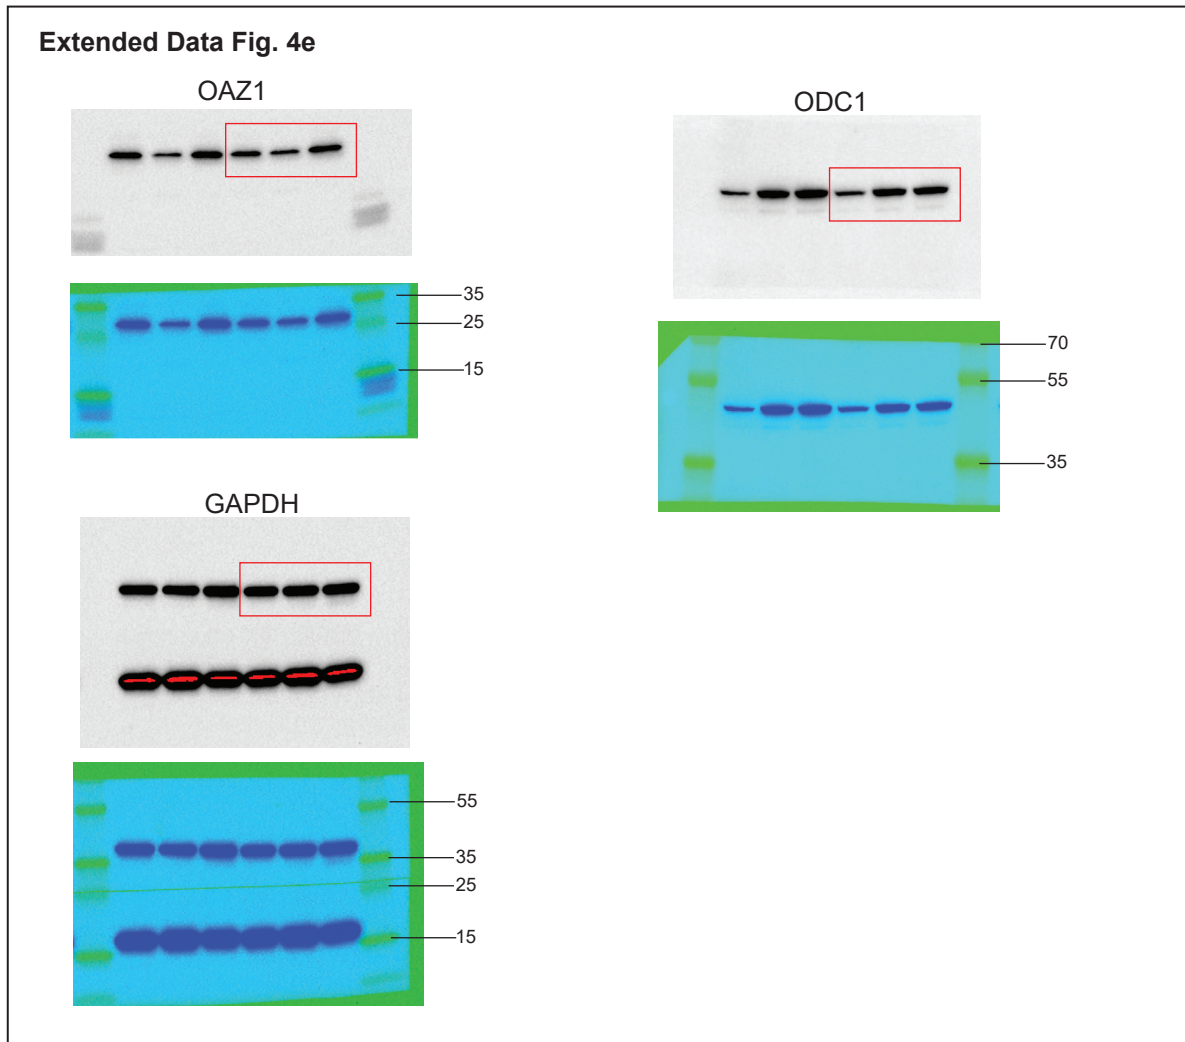

Supplement: NIHMS1771507-supplement-Li_SourceData_ED_Fig4_pdf.pdf [file NIHMS1771507-supplement-Li_SourceData_ED_Fig4_pdf.pdf]

Uncropped scans with size marker indications for Extended Data Fig. 8.

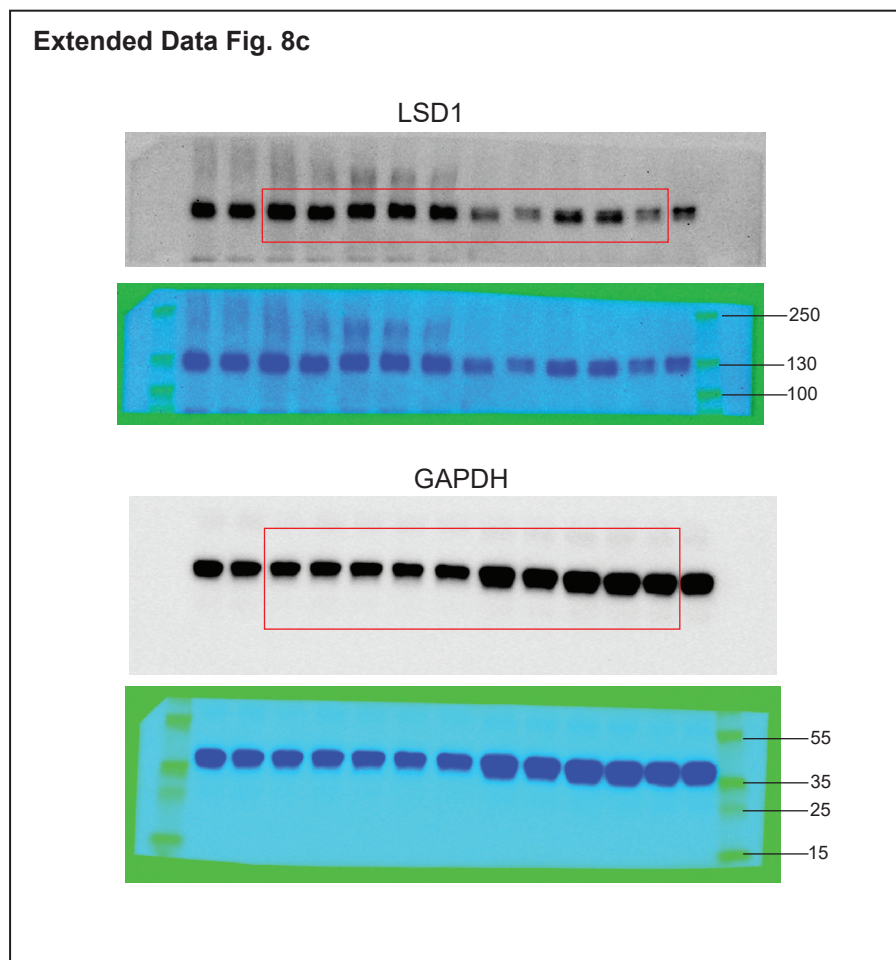

Supplement: NIHMS1771507-supplement-Li_SourceData_ED_Fig8_pdf.pdf [file NIHMS1771507-supplement-Li_SourceData_ED_Fig8_pdf.pdf]

Uncropped scans with size marker indications for Fig. 3.

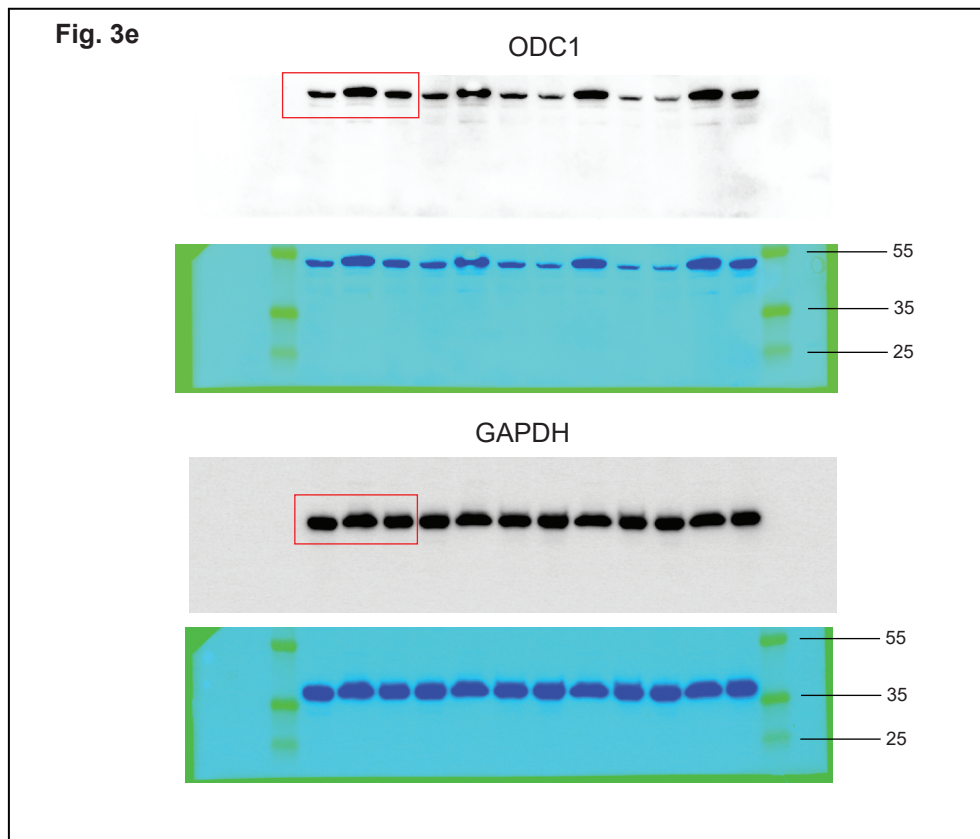

Supplement: NIHMS1771507-supplement-Li_SourceData_Fig3_pdf.pdf [file NIHMS1771507-supplement-Li_SourceData_Fig3_pdf.pdf]

Uncropped scans with size marker indications for Fig. 4.

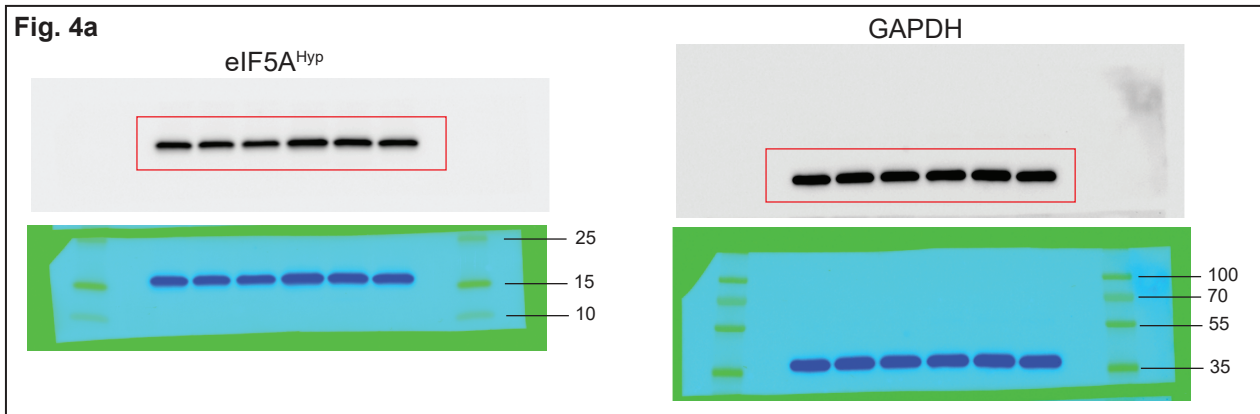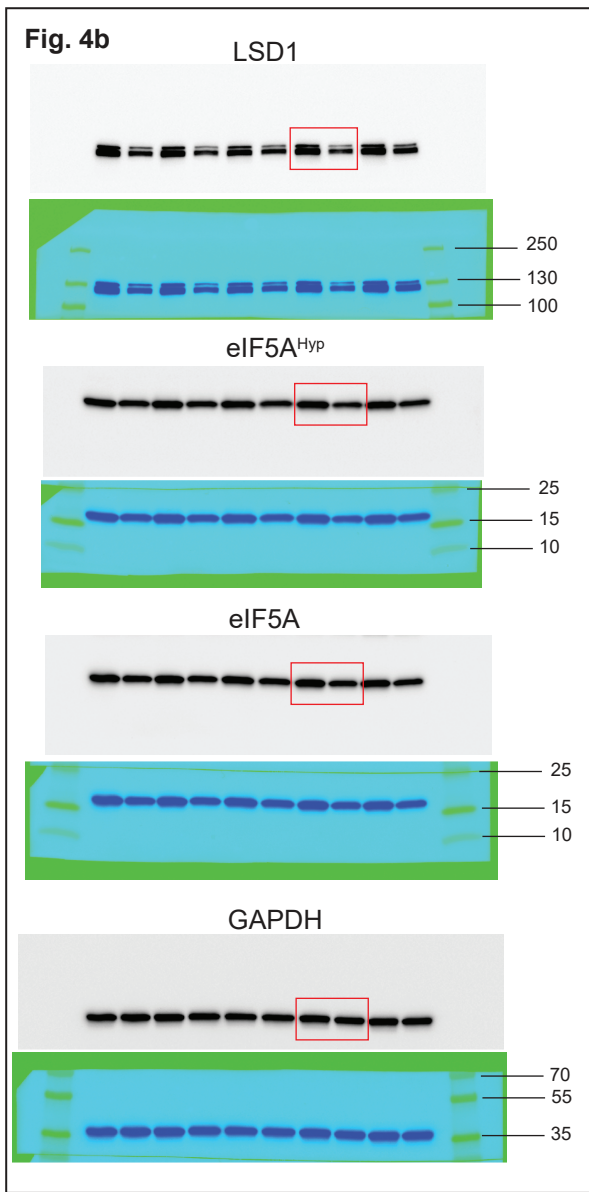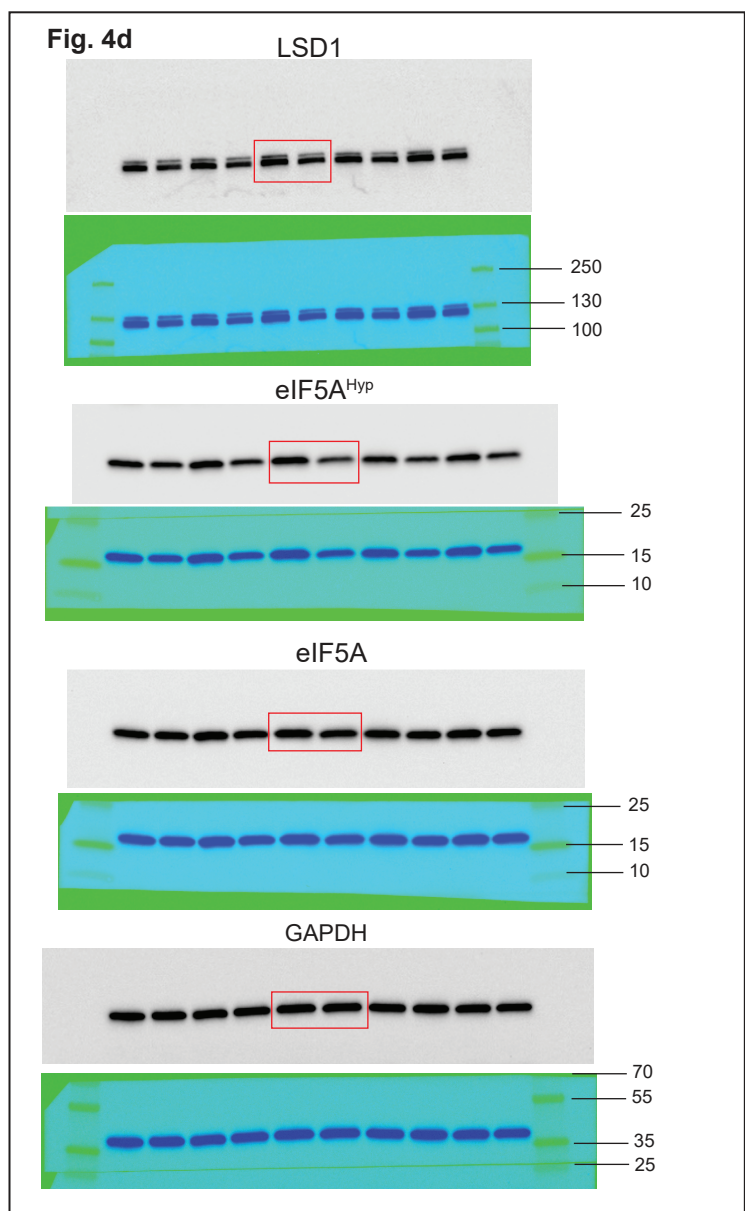

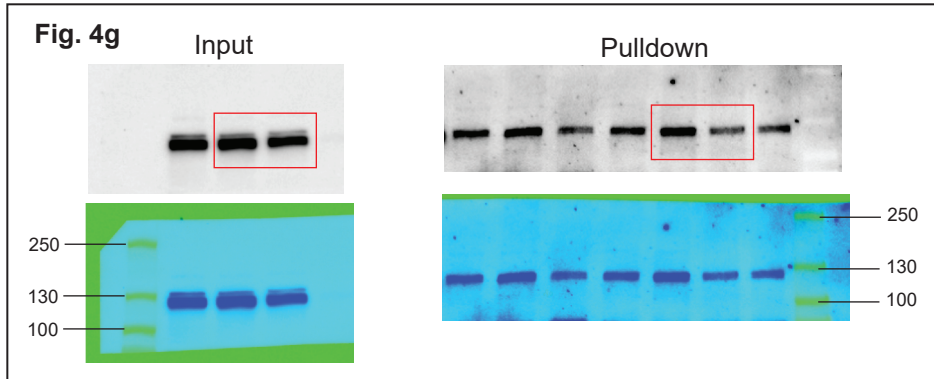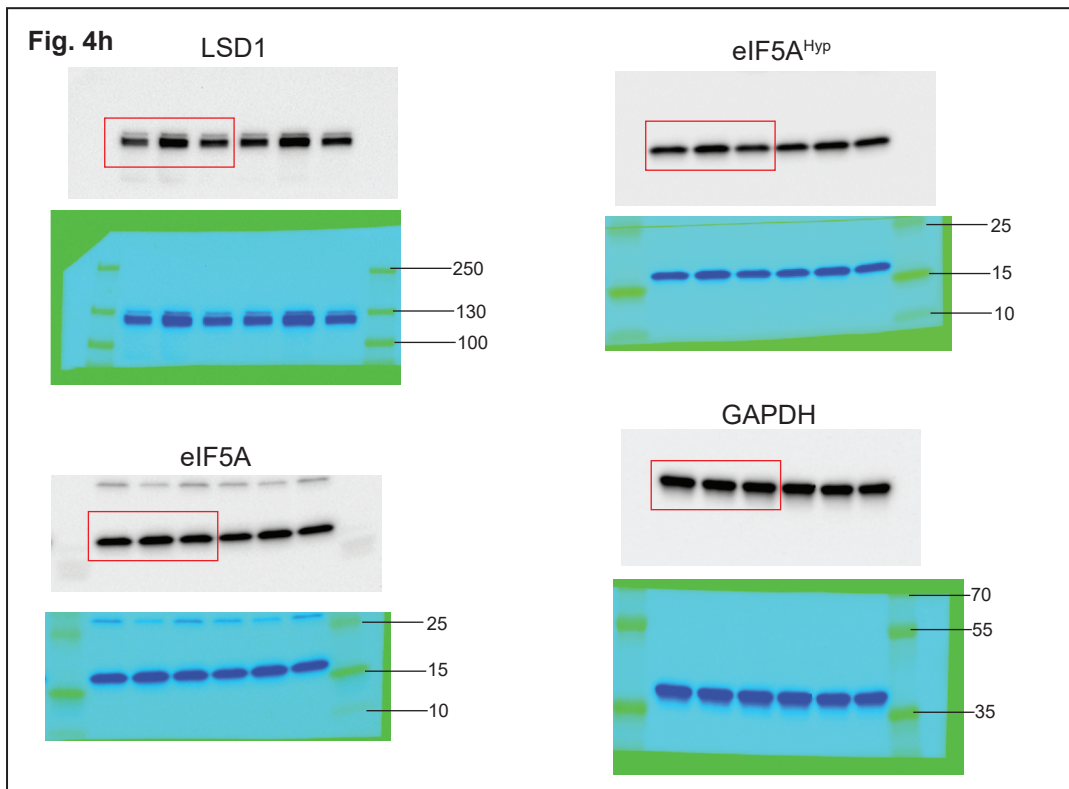

Supplement: NIHMS1771507-supplement-Li_SourceData_Fig4_pdf.pdf [file NIHMS1771507-supplement-Li_SourceData_Fig4_pdf.pdf]

Uncropped scans with size marker indications for Fig. 5.

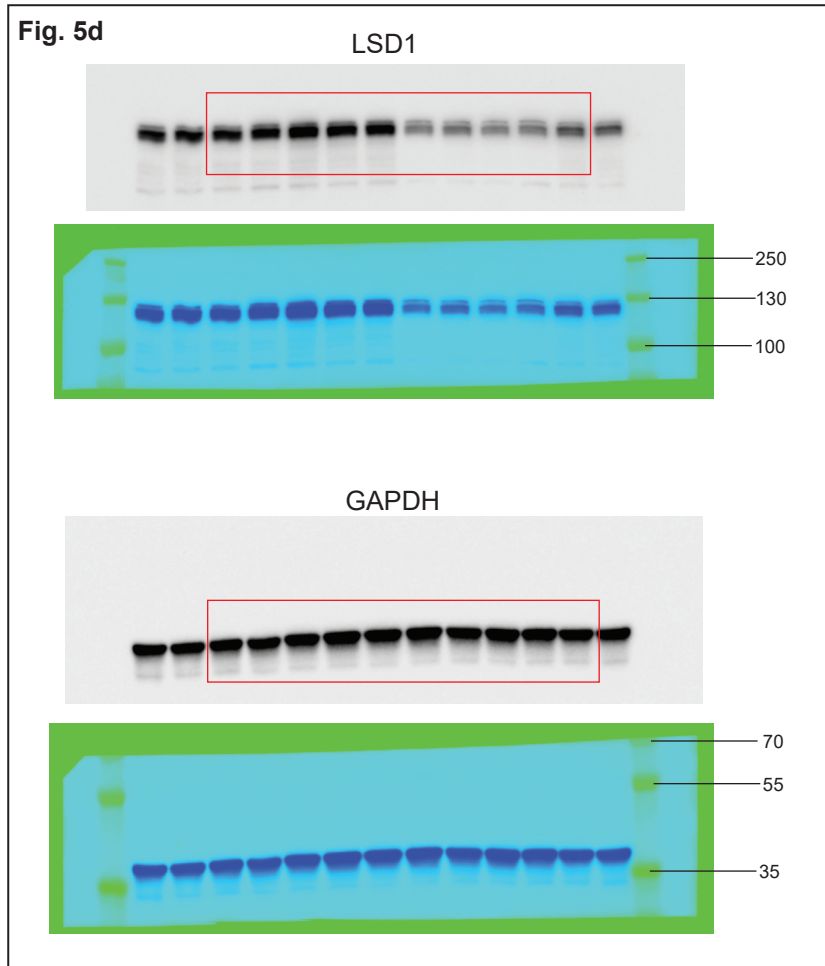

Supplement: NIHMS1771507-supplement-Li_SourceData_Fig5_pdf.pdf [file NIHMS1771507-supplement-Li_SourceData_Fig5_pdf.pdf]
